# Supplementary material
Source: PubMed Central journal article supplement (PMC6092199)
Supplement: NIHMS979045-supplement.pdf [file NIHMS979045-supplement.pdf]

## Supplementary Material

Hydroxylated and Sulfated Metabolites of Commonly Observed Airborne Polychlorinated Biphenyls Display Selective Uptake and Toxicity in N27, SH-SY5Y, and HepG2 Cells

Eric A. Rodriguez<sup>1</sup>, Brigitte C. Vanle<sup>1</sup>, Jonathan A. Doorn<sup>1</sup>, Hans-Joachim Lehmler<sup>2</sup>,  
Larry W. Robertson<sup>2</sup>, and Michael W. Duffel<sup>1</sup>

<sup>1</sup>Department of Pharmaceutical Sciences and Experimental Therapeutics, College of Pharmacy,  
and <sup>2</sup>Department of Occupational and Environmental Health, College of Public Health,  
The University of Iowa, Iowa City, Iowa 52242

## Table of Contents

|                                                                                                                                                                                                          | <u>Page</u> |
|----------------------------------------------------------------------------------------------------------------------------------------------------------------------------------------------------------|-------------|
| Figure S1. The viability of N27 cells after exposure to PCBs, OH-PCBs, and PCB sulfates in serum free media for 24 h as assessed by the reduction of MTT (panel A), and LDH release (panel B)....        | 3           |
| Figure S2. The viability of SH-SY5Y cells after exposure to PCBs, OH-PCBs, and PCB sulfates in serum free media for 24 h as assessed by the reduction of MTT (panel A), and LDH release (panel B). ..... | 4           |
| Figure S3. The viability of HepG2 cells after exposure to PCBs, OH-PCBs, and PCB sulfates in serum free media for 24 h as assessed by the reduction of MTT (panel A), and LDH release (panel B). .....   | 5           |
| Figure S4. The presence of human serum albumin (HSA) or horse serum (HS) supplementation in cell media mitigates the cytotoxic effects of both 4-OH-PCB 52, and 4-PCB 52 sulfate in N27 cells. ....      | 6           |
| Figure S5. The presence of human serum albumin (HSA) or horse serum (HS) supplementation in cell media mitigates the cytotoxic effects of both 4'-OH-PCB 3, and 4'-PCB 3 sulfate in N27 cells. ....      | 7           |
| Figure S6. The presence of human serum albumin (HSA) or horse serum (HS) supplementation in cell media mitigates the cytotoxic effects of both 4-OH-PCB 8, and 4-PCB 8 sulfate in N27 cells. 8           | 8           |
| Figure S7. The presence of human serum albumin (HSA) or horse serum (HS) supplementation in cell media mitigates the cytotoxic effects of both 4-OH-PCB 11, and 4-PCB 11 sulfate in N27 cells. ....      | 9           |

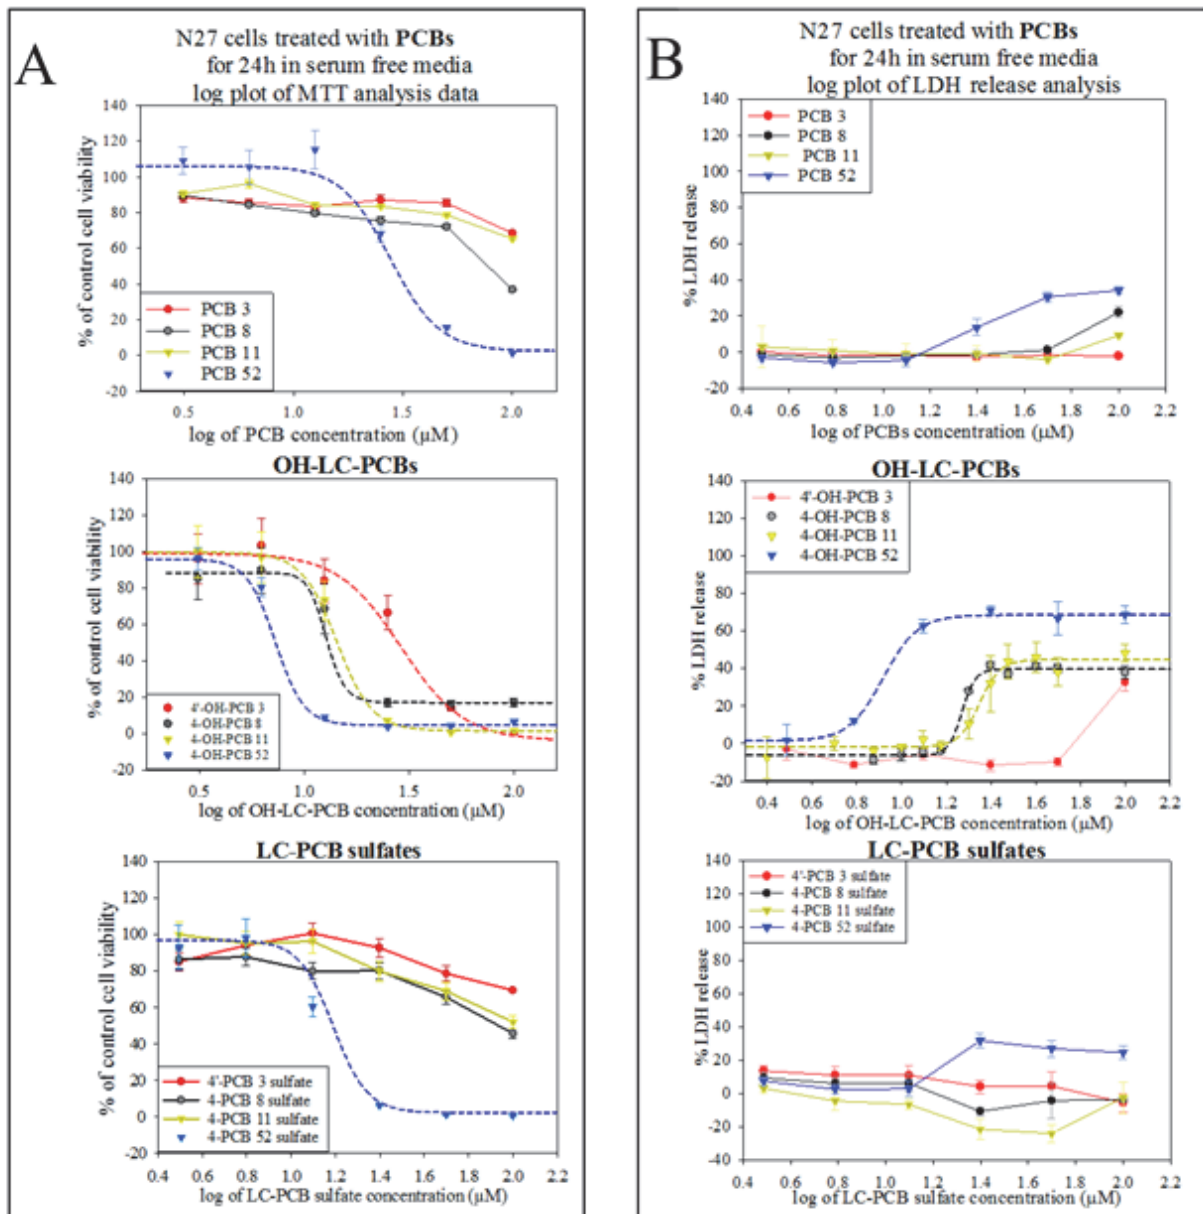

**Figure S1.** The viability of N27 cells after exposure to PCBs, OH-PCBs, and PCB sulfates in serum free media for 24 h as assessed by the reduction of MTT (panel A), and LDH release (panel B).

The data were represented as a percent of vehicle control vs. the log of the concentration of the PCB derivative, and fit to a four parameter logistic curve using SigmaPlot v.11.0, Systat Software, Chicago, IL. Data points are the mean  $\pm$  SEM, n=3.

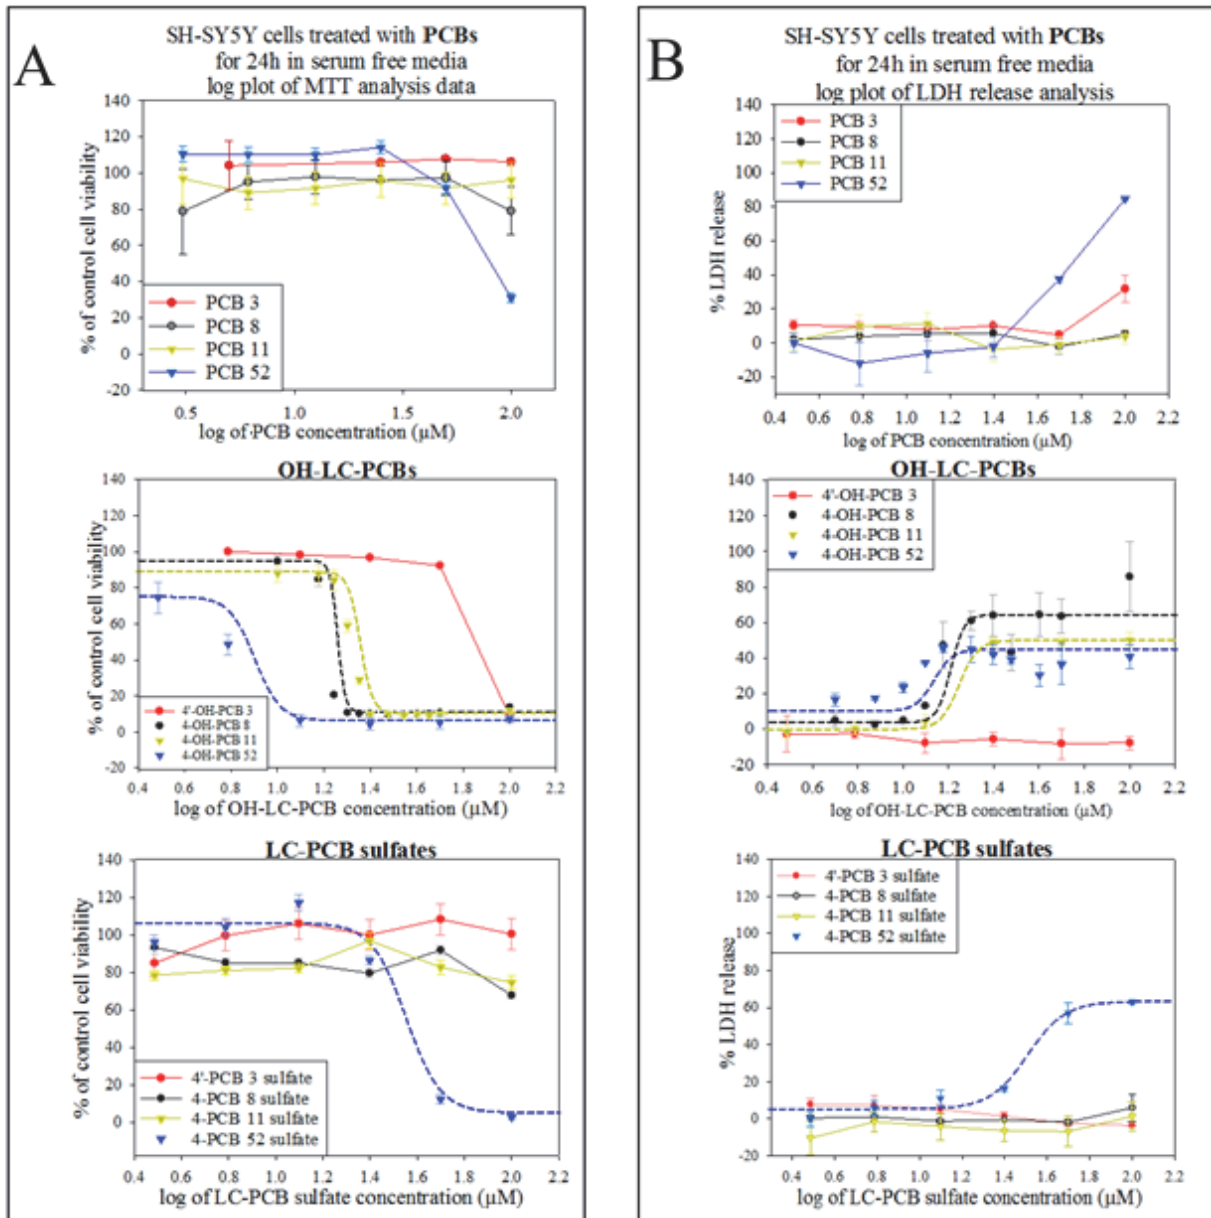

**Figure S2.** The viability of SH-SY5Y cells after exposure to PCBs, OH-PCBs, and PCB sulfates in serum free media for 24 h as assessed by the reduction of MTT (panel A), and LDH release (panel B).

The data were represented as a percent of vehicle control vs. the log of the concentration of the PCB derivative, and fit to a four parameter logistic curve using SigmaPlot v.11.0, Systat Software, Chicago, IL. Data points are the mean  $\pm$  SEM, n=3.

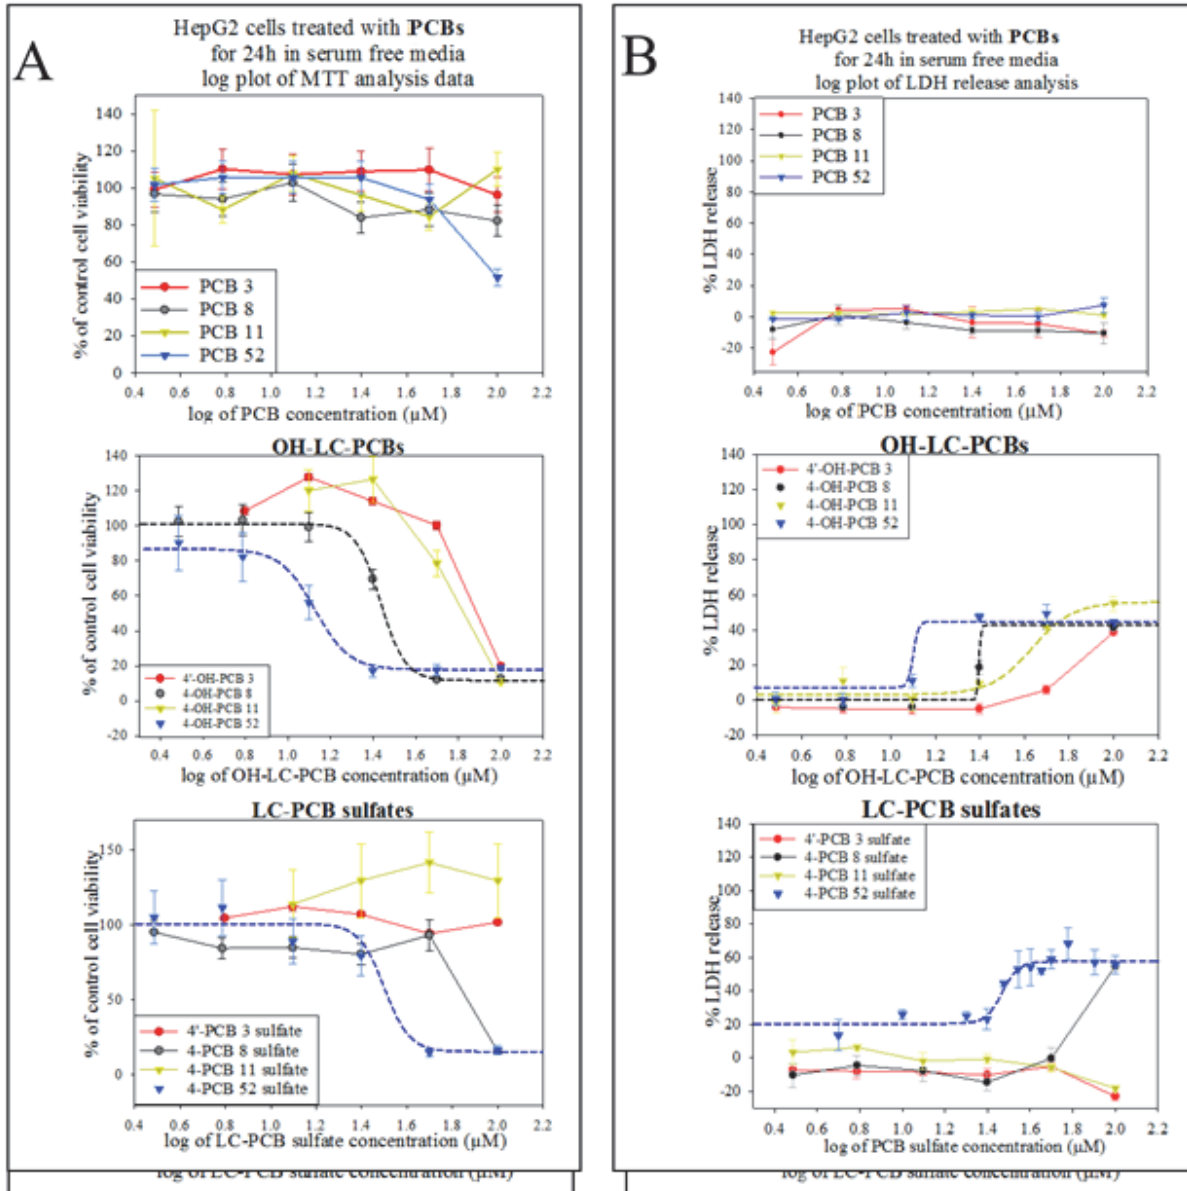

**Figure S3.** The viability of HepG2 cells after exposure to PCBs, OH-PCBs, and PCB sulfates in serum free media for 24 h as assessed by the reduction of MTT (panel A), and LDH release (panel B).

The data were represented as a percent of vehicle control vs. the log of the concentration of the PCB derivative, and fit to a four parameter logistic curve using SigmaPlot v.11.0, Systat Software, Chicago, IL. Data points are the mean  $\pm$  SEM, n=3.

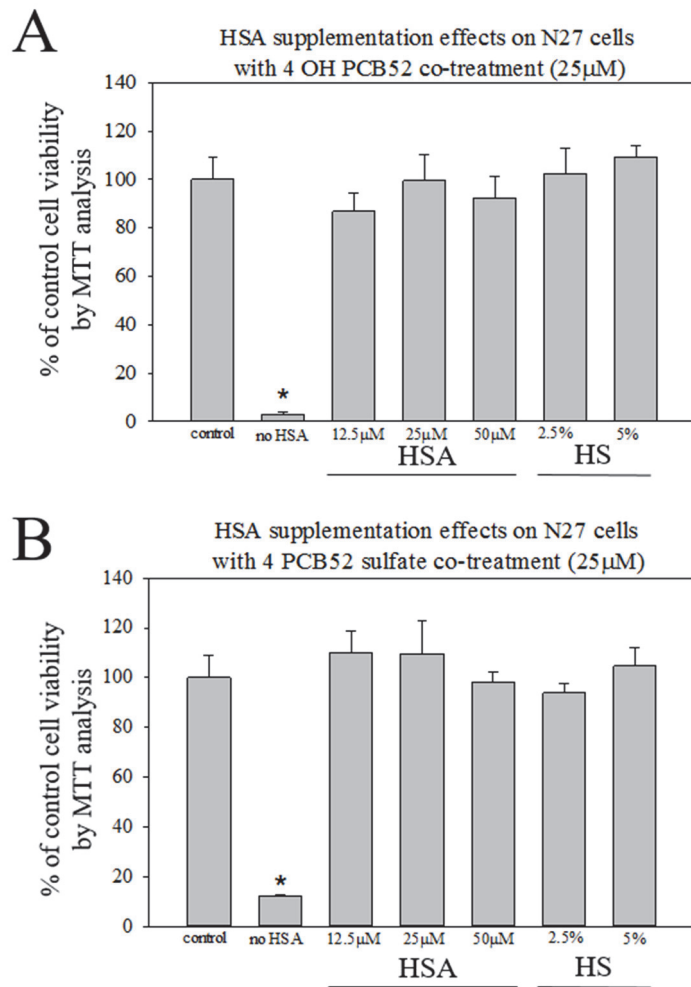

**Figure S4.** The presence of human serum albumin (HSA) or horse serum (HS) supplementation in cell media mitigates the cytotoxic effects of both 4-OH-PCB 52, and 4-PCB 52 sulfate in N27 cells.

N27 cells treated with 25  $\mu$ M PCB metabolite were co-incubated with increasing amounts of HSA or horse serum. Data are reported as the percent of control cell viability by MTT analysis. n=3, (\* P<0.001 of control)

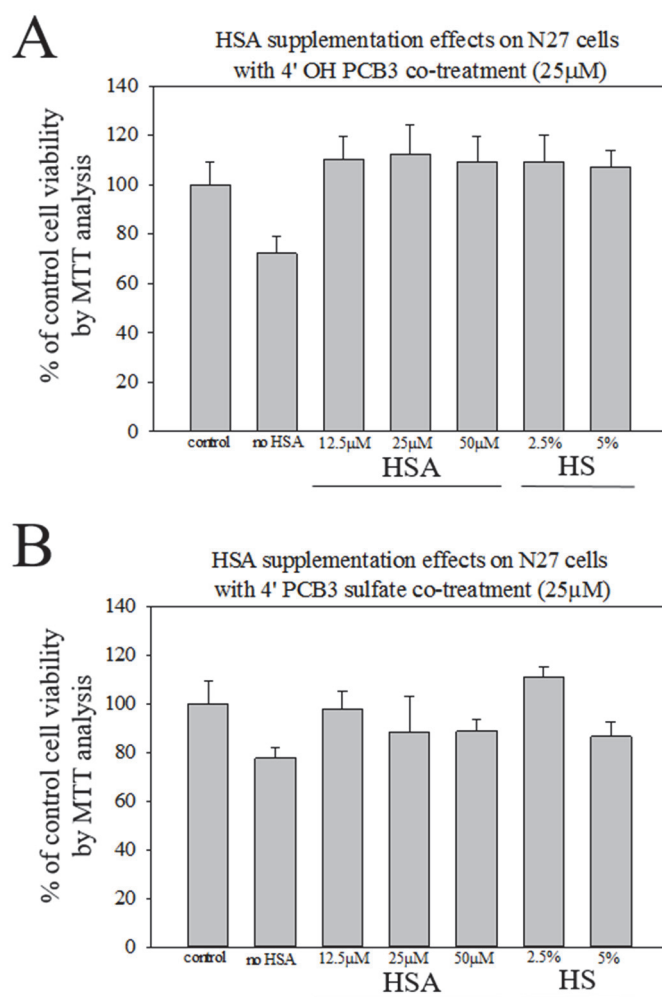

**Figure S5.** The presence of human serum albumin (HSA) or horse serum (HS) supplementation in cell media mitigates the cytotoxic effects of both 4'-OH-PCB 3, and 4'-PCB 3 sulfate in N27 cells.

N27 cells treated with 25  $\mu$ M PCB metabolite were co-incubated with increasing amounts of HSA or horse serum. Data are reported as the percent of control cell viability by MTT analysis. n=3

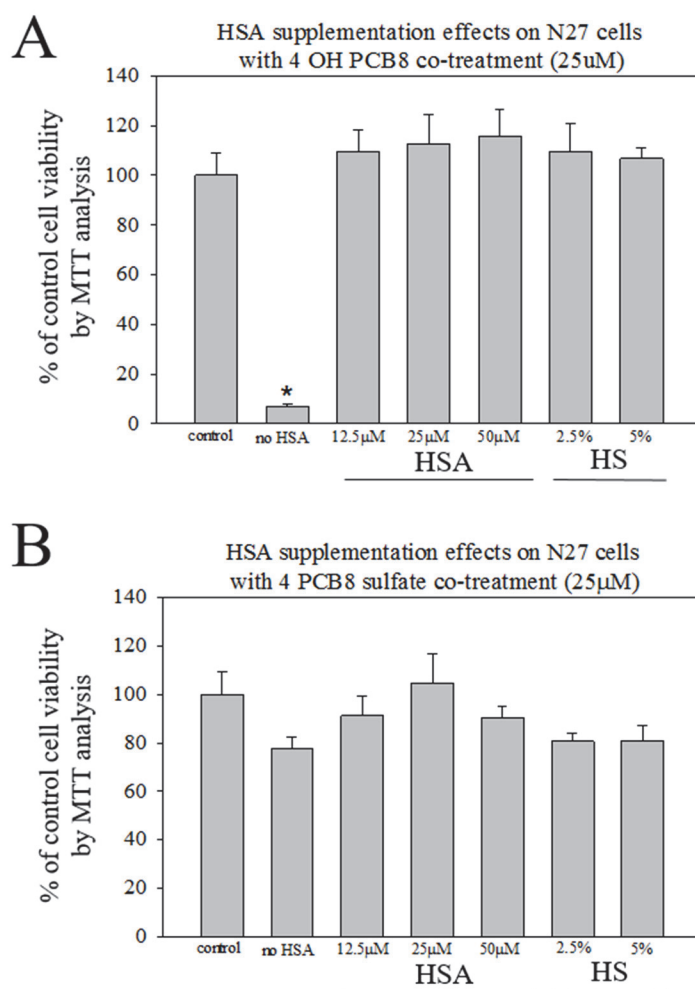

**Figure S6.** The presence of human serum albumin (HSA) or horse serum (HS) supplementation in cell media mitigates the cytotoxic effects of both 4-OH-PCB 8, and 4-PCB 8 sulfate in N27 cells.

N27 cells treated with 25  $\mu$ M PCB metabolite were co-incubated with increasing amounts of HSA or horse serum. Data are reported as the percent of control cell viability by MTT analysis. n=3, (\* P<0.001 of control)



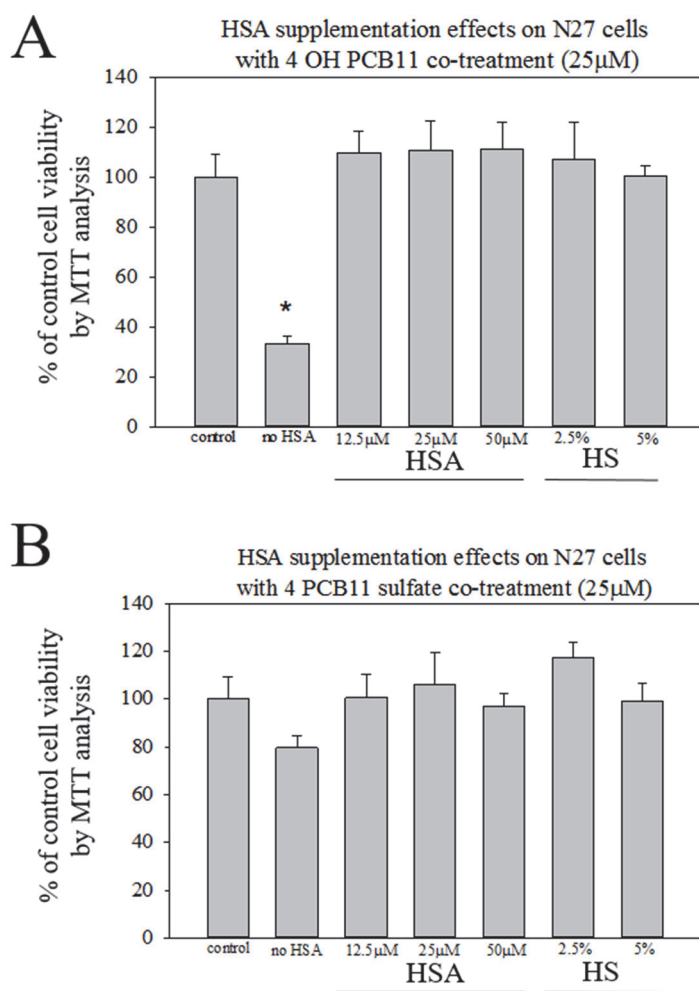

**Figure S7.** The presence of human serum albumin (HSA) or horse serum (HS) supplementation in cell media mitigates the cytotoxic effects of both 4-OH-PCB 11, and 4-PCB 11 sulfate in N27 cells.

N27 cells treated with 25  $\mu$ M PCB metabolite were co-incubated with increasing amounts of HSA or horse serum. Data are reported as the percent of control cell viability by MTT analysis. n=3, (\* P<0.001 of control)
